# Supplementary material for: Hydrogenation of nitriles to primary amines over a highly dispersed Ni/SiC catalyst without ammonia addition
Source: Royal Society of Chemistry journal article supplement (doi:10.1039/d3nj05846h), 2024-01-01
Supplement: d3nj05846h1.pdf [file d3nj05846h1.pdf]

## Supporting information

### **Hydrogenation of Nitriles to Primary Amines Over Highly Dispersed Ni/SiC Catalyst Without Ammonia Addition**

Zhi-Feng Jiao, Zhi-Yuan Zheng, Ji-Xiao Zhao\*, Cheng-Du Zhang, Tian-Yu Xu,  
and Xiang-Yun Guo\*

Jiangsu Key Laboratory of Advanced Catalytic Materials and Technology,  
School of Petrochemical Engineering, Changzhou University, Changzhou  
213164, China

## Tables and Figures

**Table S1. Optimization of reaction conditions for BN hydrogenation over Ni/SiC.**

| Entry | Solvent     | Conv. (%) | Select. (%) |
|-------|-------------|-----------|-------------|
| 1     | Methanol    | 57%       | 77%         |
| 2     | Ethanol     | 51%       | 77%         |
| 3     | i-Propanol  | 38%       | 76%         |
| 4     | Hexane      | 44%       | 39%         |
| 5     | 1,4-Dioxane | 11%       | 69%         |
| 6     | THF         | 19%       | 74%         |

Reaction conditions: 1 mmol of BN, 20 mL of solvent, 100 mg of catalyst, 2 MPa of H<sub>2</sub>, 120 °C, reaction time was 2 h.

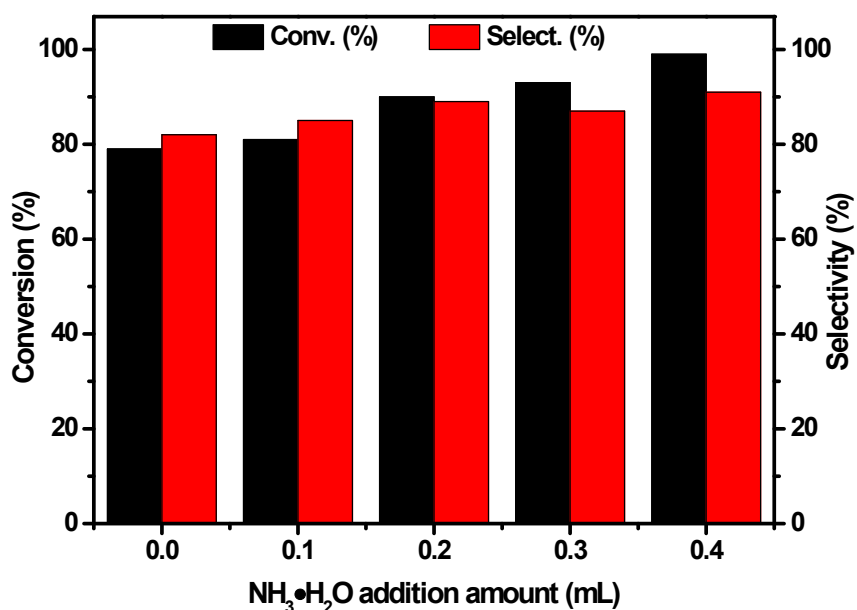

**Figure S1.** The effect of ammonia addition on the hydrogenation of BN. Reaction conditions: 1 mmol of BN, 20 mL of methanol, 0.1-0.4 mL of NH<sub>3</sub>•H<sub>2</sub>O, 100 mg of catalyst, 2 MPa of H<sub>2</sub>, 150 °C, reaction time was 1.5 h.

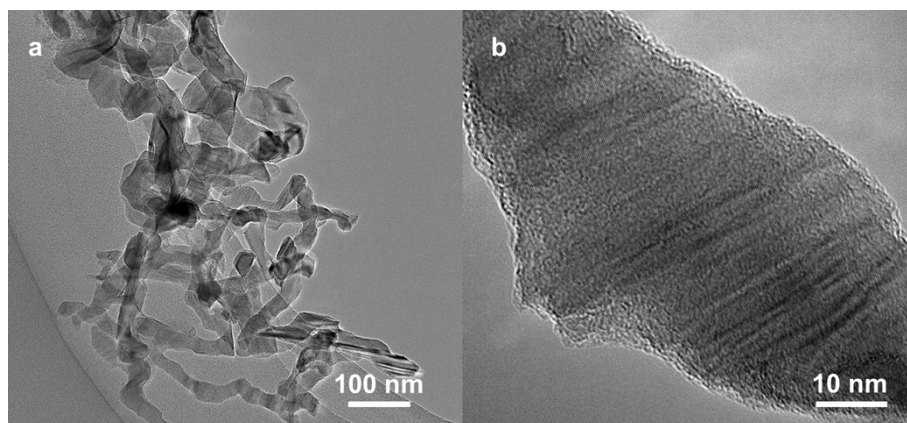

**Figure S2.** TEM (a) and HRTEM (b) images of Ni/SiC

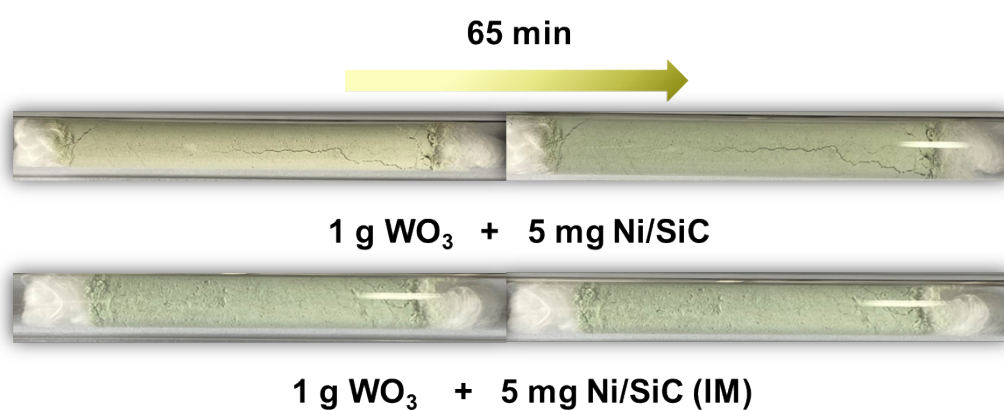

**Figure S3.** Comparison of the H-spillover capability of different catalysts by reducing WO<sub>3</sub> at 30 °C with a H<sub>2</sub> flow of 10 mL/min

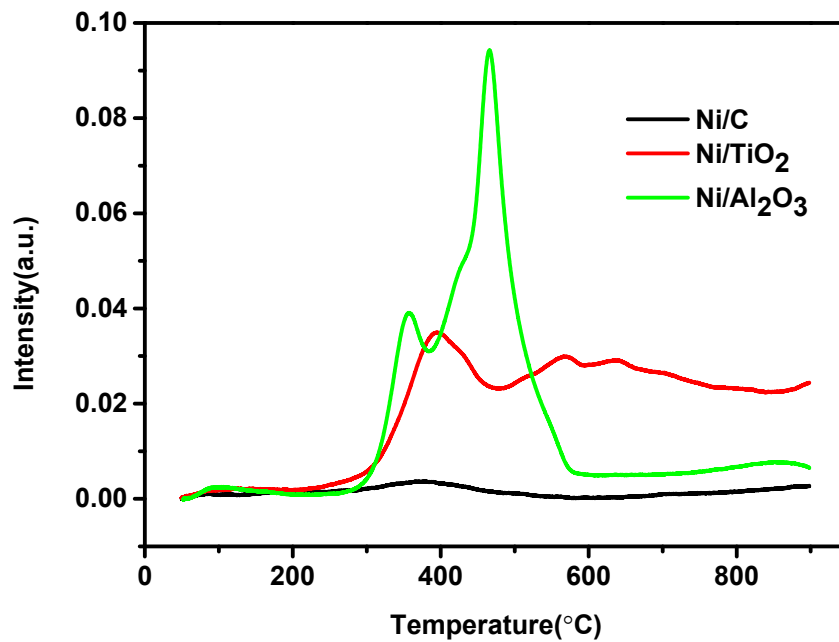

**Figure S4.** CO<sub>2</sub>-TPD profiles of Ni/C, Ni/Al<sub>2</sub>O<sub>3</sub> and Ni/TiO<sub>2</sub>

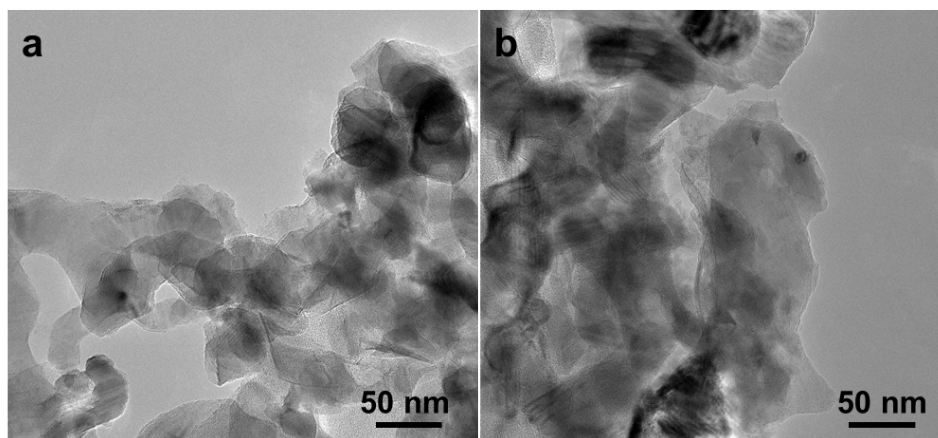

**Figure S5.** TEM images of Ni/SiC after 5 times used

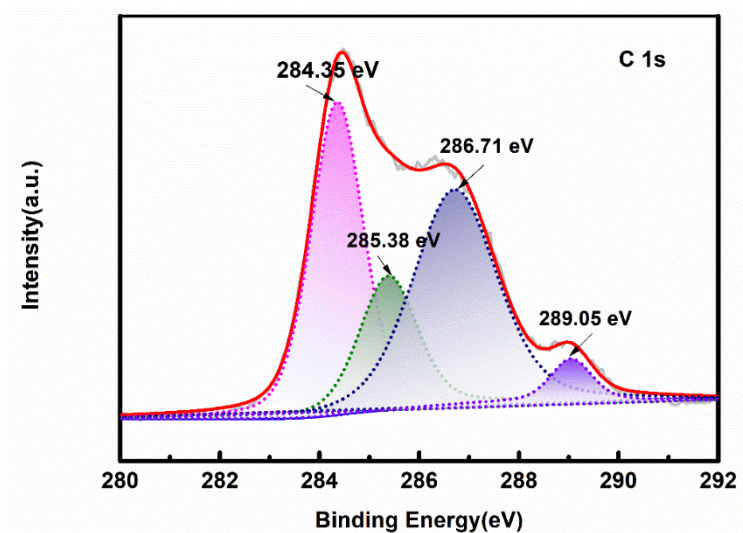

**Figure S6.** C 1s XPS spectrum of Ni/SiC
